# Supplementary material
Source: publisher figshare collection journal article supplement (https://karger.figshare.com/articles/dataset/_/4246295)
Supplement: Supplementary file 1 [file 1]

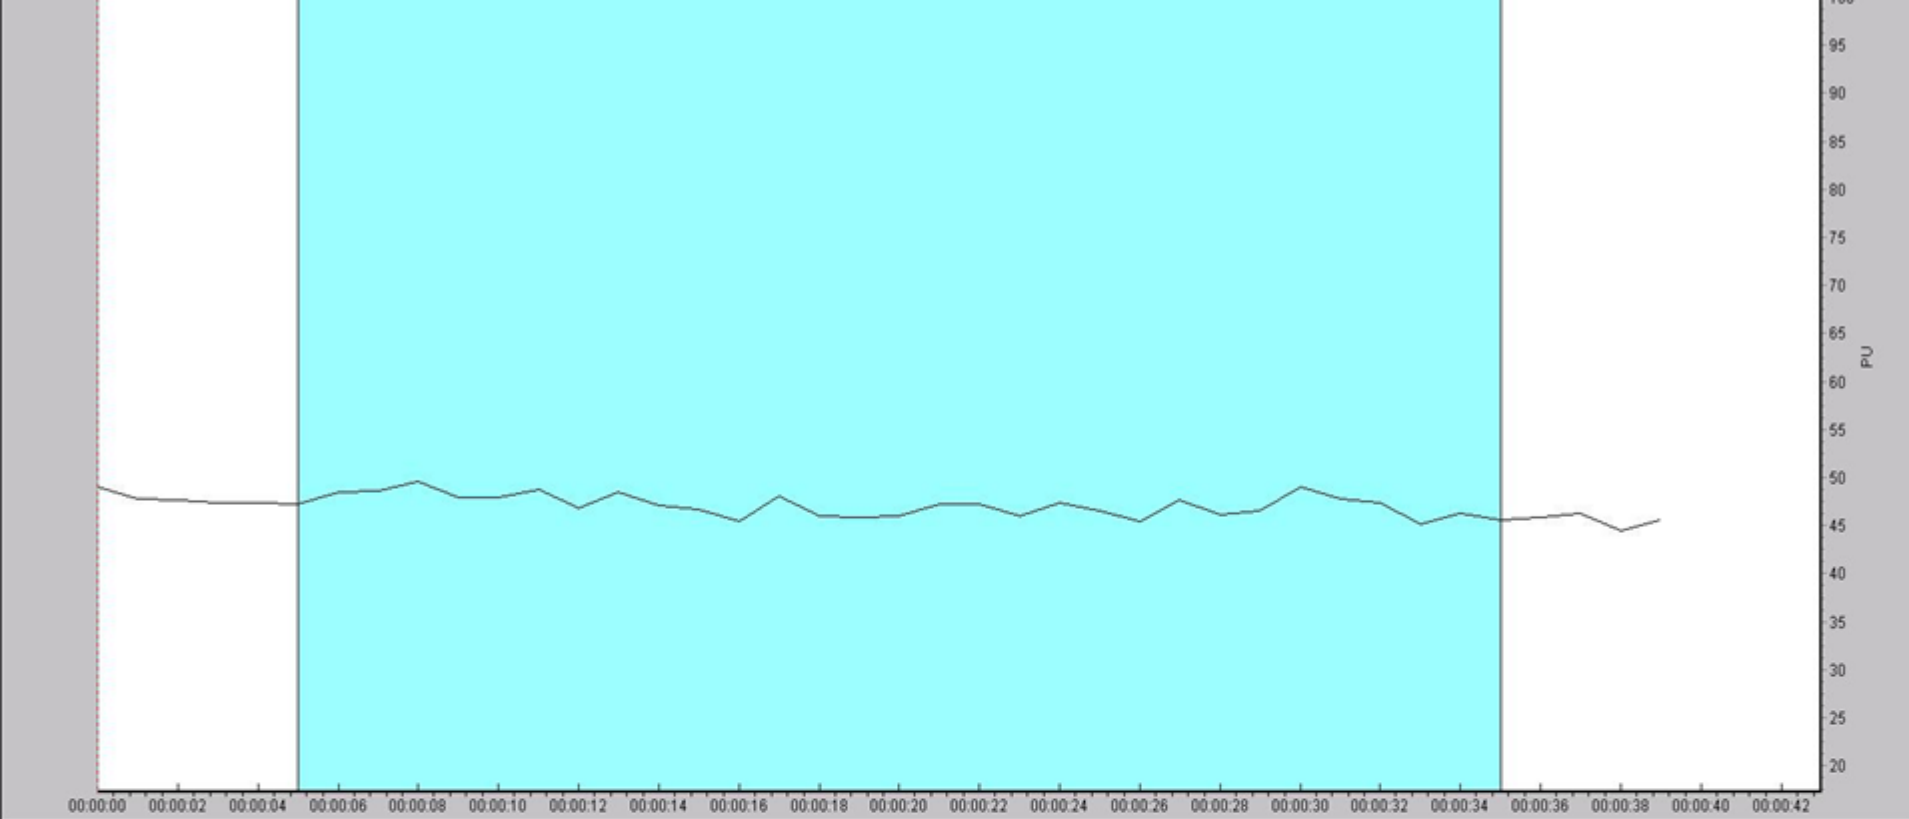

File Options Report

#### Time ROIs Setup Information

| ROI No | Label | Start Time   | End Time     | Duration     | Samples |
|--------|-------|--------------|--------------|--------------|---------|
| 1*     | ROI 1 | 00:00:05.000 | 00:00:35.000 | 00:00:31.000 | 31      |

ROI Based

Param Based

Active ROI

Report Design

Report Preview

#### Time ROIs Statistics Results

| ROI No | Param   | Mean | S. Dev | S. Err | Median | Min  | Max  | T of Min | T of Max | Sum    | Area   | Offset | Slope | TC  |
|--------|---------|------|--------|--------|--------|------|------|----------|----------|--------|--------|--------|-------|-----|
| 1*     | Mean F1 | 47,1 | 1,2    | 0,21   | 47,2   | 45,1 | 49,7 | 00:00:33 | 00:00:08 | 1460,4 | 1460,4 | 48,0   | -0,1  | off |
